# Supplementary material for: β-catenin is selectively required for the expansion and regeneration of mature pancreatic acinar cells in mice
Source: PubMed Central journal article supplement — Dis Model Mech. 2012 Jan 19;5(4):503–14. doi: 10.1242/dmm.007799 (PMC3380713; doi:10.1242/dmm.007799), 2012-01-19
Supplement: supp_007799_DMM007799TableS1.pdf [file supp_007799_DMM007799TableS1.pdf]

**Table 1. Primary antibodies used in this study**

| <b>Antigen</b>    | <b>Species</b> | <b>Source</b>                        | <b>Catalog #</b> | <b>Dilution</b> |
|-------------------|----------------|--------------------------------------|------------------|-----------------|
| amylase           | sheep          | BioGenesis                           | 0480-0104        | 1:2000          |
| amylase           | rabbit         | Sigma                                | A8273            | 1:2000          |
| $\beta$ -catenin  | mouse          | BD Biosciences                       | BD610153         | 1:1000          |
| $\beta$ -catenin  | goat           | R&D Systems                          | AF1329           | 1:1000          |
| BrdU              | rat            | Abcam                                | Ab6326           | 1:1000          |
| cleaved caspase-3 | rabbit         | Cell Signaling Technology            | 9664S            | 1:100           |
| cytokeratin-19    | rat            | Developmental Studies Hybridoma Bank | TROMA-3          | 1:50            |
| cytokeratin-19    | rabbit         | Epitomics                            | 3863-1           | 1:1000          |
| E-cadherin        | rat            | Invitrogen                           | 13-1900          | 1:2000          |
| GFP               | rabbit         | Abcam                                | ab290            | 1:4000          |
| GFP               | goat           | Rockland                             | 600-101-215      | 1:2500          |
| glucagon          | rabbit         | Zymed / Invitrogen                   | 18-0064          | 1:200           |
| insulin           | guinea pig     | Dako                                 | A0564            | 1:1000          |
| Ki67              | rabbit         | Vector labs                          | VP-RM04          | 1:150           |
| Pdx1              | guinea pig     | Chris Wright (Vanderbilt University) |                  | 1:10,000        |
| Ptf1a             | rabbit         | Chris Wright (Vanderbilt University) |                  | 1:20,000        |
